# Supplementary material for: Microbial Community, Newly Sequestered Soil Organic Carbon, and δ15N Variations Driven by Tree Roots
Source: PubMed Central journal article supplement (PMC7056912; doi:10.3389/fmicb.2020.00314), 2020-02-27

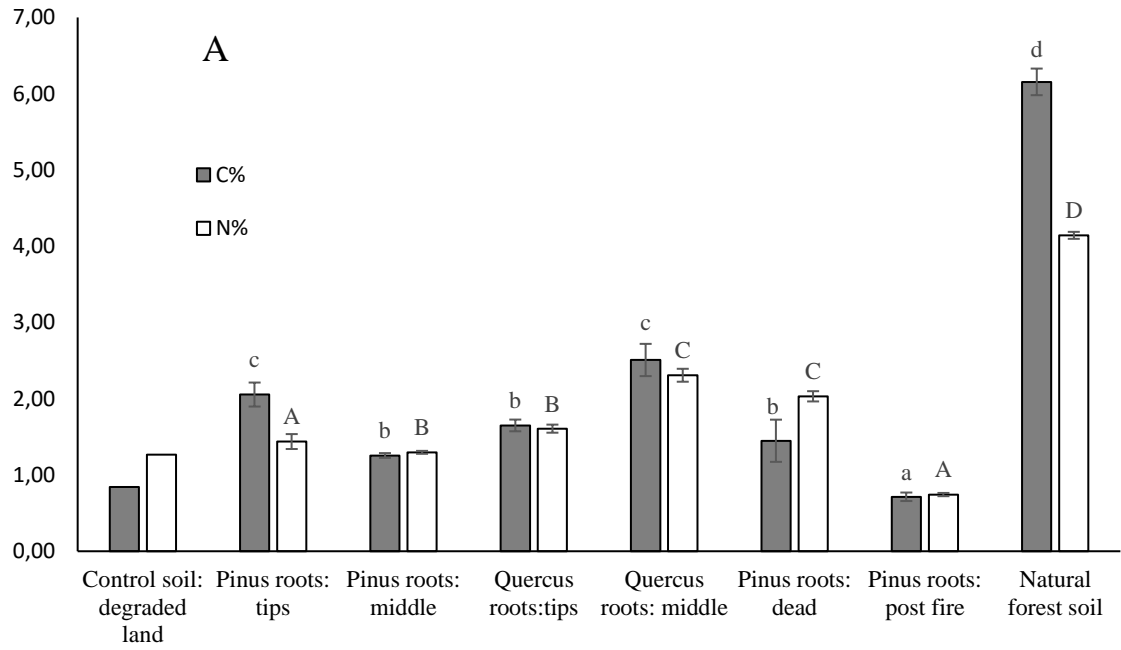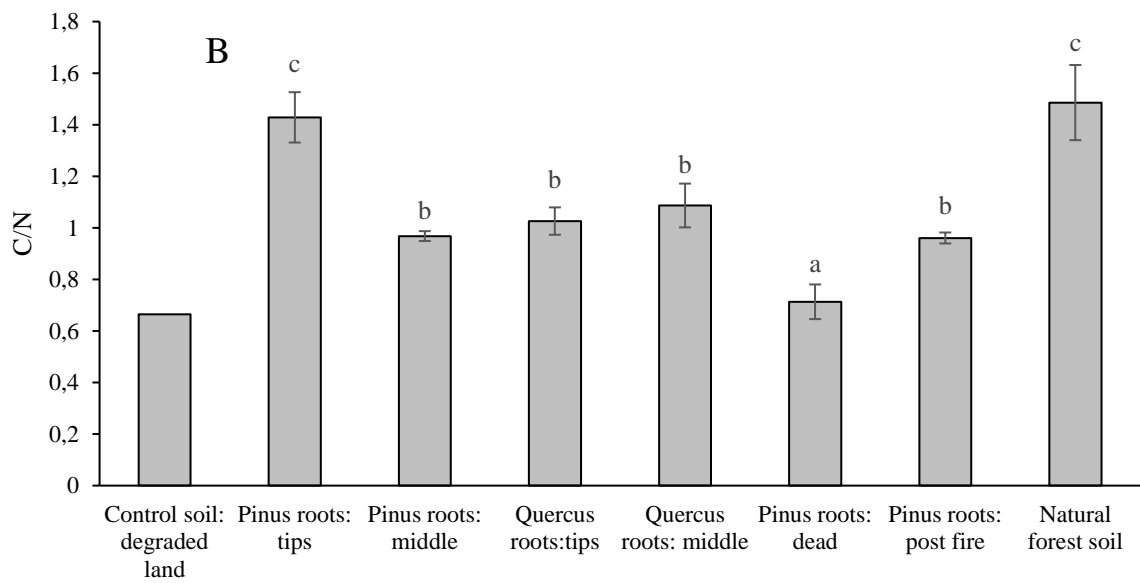

Supplement: Image_1.pdf [file Image_1.pdf]
